# Supplementary material for: Phosphine-free synthesis of ZnSe:Mn and ZnSe:Mn/ZnS doped quantum dots using new Se and S precursors
Source: Royal Society of Chemistry journal article supplement (doi:10.1039/c3nj00998j), 2013-10-21

## Electronic Supplementary Information (ESI)

# Phosphine-Free Synthesis of ZnSe:Mn<sup>2+</sup> and ZnSe:Mn<sup>2+</sup>/ZnS Doped Quantum Dots Using New Se and S Precursors

Lai-Jun Zhang,<sup>\*a,c</sup> Xing-Can Shen,<sup>\*b</sup> Hong Liang,<sup>b,c</sup> Fa-Yun Chen,<sup>a</sup> and Hai-Jin Huang<sup>a</sup>

<sup>a</sup> School of Chemistry and Chemical Engineering, Shangrao Normal University, Shangrao 334001, China. Tel: +86 793 8150637; E-mail: ljzhang@sru.jx.cn

<sup>b</sup> Key Laboratory for the Chemistry and Molecular Engineering of Medicinal Resources (Ministry of Education, School of Chemistry and Chemical Engineering, Guangxi Normal University, Guilin 541004, China. Tel: +86 773 5846273; E-mail: xcshen@gxnu.edu.cn

<sup>c</sup> School of Chemistry and Chemical Engineering, Nanjing University, Nanjing 210093, PR China<sup>c</sup> School of Chemistry and Chemical Engineering, Nanjing University, Nanjing 210093, China

### 1. Infrared (IR) spectroscopy of Mn precursor

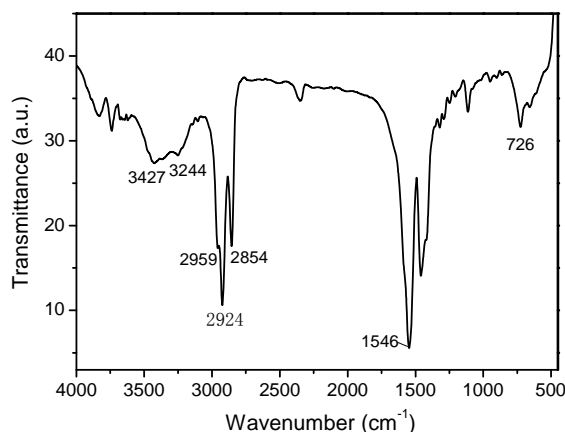

**Fig. S1** IR spectrum of Mn precursor

IR spectrum of the used Mn precursor has been acquired on a Nicolet 360E.FP Fourier transform infrared spectrophotometer and further shown in Fig. S1. There are three strong vibration peaks at 2959, 2924 and 2854 cm<sup>-1</sup>, respectively, from the asymmetry and symmetrical C—H stretching vibration, indicating the presence of CH<sub>3</sub> and CH<sub>2</sub> group in the Mn precursor. Also the Mn precursor is a carboxylic acid salt, which is indicated by a strong carbonyl vibration absorption peak at the 1546 cm<sup>-1</sup>. So, the above results illustrate the presence of the bonding between nonanoic

acid and  $\text{Mn}^{2+}$  according to the preparation conditions of Mn precursor.

## 2. Elemental analysis of Mn precursor

Found from Mn precursor: C, 58.34%; H, 9.39%.

Calculated from manganese nonanoate  $\text{Mn}(\text{NA})_2$ : C, 58.52%; H, 9.28%.

The measured results from Mn precursor is very close to the calculated value from  $\text{Mn}(\text{NA})_2$ .

## 3. Thermal gravimetric analysis of Mn precursor

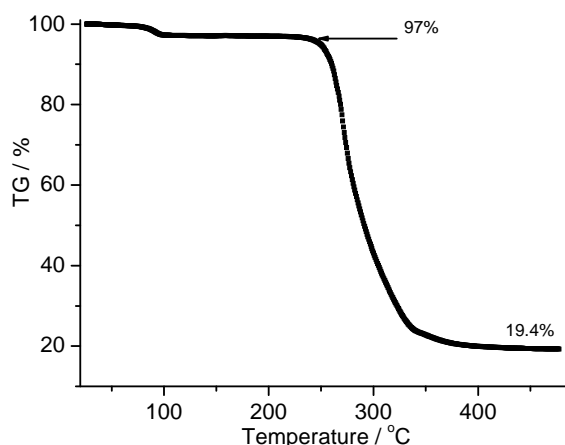

**Fig. S2** Thermal gravimetric curve of Mn precursor

Fig. S2 shows the thermal gravimetric curve of Mn precursor from 25 to 475 °C. There are two obvious weightless platform: one in the range of 80-101 °C due to the lost of adsorbed water and then continuous weightlessness from 245 °C to about 350 °C. The final residue was approximately 19%, in good agreement with the theoretical Mn content (19.2 %) based on  $\text{MnO}$  as the residue of manganese nonanoate.

## 4. Conclusion

According to the above results from infrared spectroscopy, elemental analysis and thermal gravimetric analysis, it is believed that the manganese precursor is manganese nonanoate  $[\text{Mn}(\text{NA})_2]$ . In addition, the excess of nonanoic acid relative to  $\text{Mn}^{2+}$  used in the reaction (the ratio of nonanoic acid to  $\text{Mn}^{2+}$  is 3) favors the complete replacement of acetate with nonanoate to form  $\text{Mn}(\text{NA})_2$ . The preparation reaction of Mn precursor can be represented by the following formula:

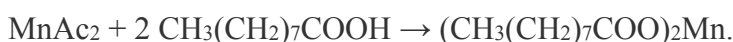

Supplement: c3nj00998j.pdf [file c3nj00998j.pdf]
